# Supplementary material for: Complexity of Bidirectional Transcription and Alternative Splicing at Human RCAN3 Locus
Source: PubMed Central journal article supplement (PMC3178534; doi:10.1371/journal.pone.0024508), 2011-09-22
Supplement: pone.0024508.s004.pdf [file pone.0024508.s004.pdf]

**Table S1. Single nucleotide polymorphisms (SNPs) of new *RCAN3* isoforms**

| <b><i>RCAN3</i> isoforms</b> | <b>GenBank accession no.</b> | <b>dbSNP cluster: rs196429</b> | <b>dbSNP cluster: rs196430</b> | <b>dbSNP cluster: rs196432</b> |
|------------------------------|------------------------------|--------------------------------|--------------------------------|--------------------------------|
| <i>RCAN3-1,2,3,4,5</i>       | NM_013441                    | G (727 bp) <sup>a</sup>        | G (775 bp)                     | G (976 bp)                     |
| <i>RCAN3-1,2,3,4,5</i>       | BC035854                     | A (727 bp)                     | A (775 bp)                     | A (976 bp)                     |
| <i>RCAN3-1,3,4,5</i>         | HQ287726                     | G (256 bp)                     | G (304 bp)                     | G (505 bp)                     |
| <i>RCAN3-1c,2,3,4,5</i>      | HQ317426                     | G (477 bp)                     | G (525 bp)                     | A (726 bp)                     |
| <i>RCAN3-1c,3,4,5</i>        | HQ317427                     | G (223 bp)                     | G (271 bp)                     | G (472 bp)                     |
| <i>RCAN3-1a,2,3,4,5</i>      | HQ317421                     | A (562 bp)                     | A (610 bp)                     | G (811 bp)                     |
| <i>RCAN3-1a,3,4,5</i>        | HQ317422                     | A (308 bp)                     | G (356 bp)                     | A (557 bp)                     |
| <i>RCAN3-1b,2,3,4,5</i>      | HQ317423                     | A (608 bp)                     | A (656 bp)                     | A (857 bp)                     |

<sup>a</sup> Base pair in brackets referred to the corresponding GenBank sequence (“GenBank accession no.” column)
