# Supplementary material for: Complexity of Bidirectional Transcription and Alternative Splicing at Human RCAN3 Locus
Source: PubMed Central journal article supplement (PMC3178534; doi:10.1371/journal.pone.0024508), 2011-09-22
Supplement: pone.0024508.s005.pdf [file pone.0024508.s005.pdf]

**Table S2. Alternative first exons in other species**

| <b>cDNA</b>             | <b>nr/nt or refseq_rna others</b>               | <b>EST others</b> | <b>genomic sequence others</b>                                      |
|-------------------------|-------------------------------------------------|-------------------|---------------------------------------------------------------------|
| <i>RCAN3-1,2,3,4,5</i>  | <u><i>Pan troglodytes</i></u> :<br>XM_001167542 | None              | Listed in Table S3                                                  |
|                         | <u><i>Pongo abelii</i></u> :<br>XM_002811276    |                   |                                                                     |
| <i>RCAN3-1,3,4,5</i>    | None                                            | None              | Listed in Table S3                                                  |
| <i>RCAN3-1a,2,3,4,5</i> | None                                            | None              | <u><i>Pongo abelii</i></u> :<br>NW_002875515                        |
|                         |                                                 |                   | <u><i>Callithrix jacchus</i></u> :<br>NW_003183707                  |
| <i>RCAN3-1a,3,4,5</i>   | None                                            | None              | <u><i>Pongo abelii</i></u> :<br>NW_002875515                        |
|                         |                                                 |                   | <u><i>Callithrix jacchus</i></u> :<br>NW_003183707                  |
| <i>RCAN3-1b,2,3,4,5</i> | None                                            | None              | <u><i>Pan troglodytes</i></u> :<br>NW_001230294,<br>AADA01267496    |
|                         |                                                 |                   | <u><i>Pongo abelii</i></u> :<br>NW_002875515                        |
|                         |                                                 |                   | <u><i>Macaca mulatta</i></u> :<br>NW_001111036,<br>AANU01188091     |
|                         |                                                 |                   | <u><i>Callithrix jacchus</i></u> :<br>NW_003183707,<br>ACFV01133095 |
|                         |                                                 |                   | <u><i>Loxodonta africana</i></u> :<br>AAGU03057323                  |

|                      |                                                                                |                                                                                                                                                                                                                                                                                                |                                                                     |
|----------------------|--------------------------------------------------------------------------------|------------------------------------------------------------------------------------------------------------------------------------------------------------------------------------------------------------------------------------------------------------------------------------------------|---------------------------------------------------------------------|
|                      |                                                                                |                                                                                                                                                                                                                                                                                                | <u><i>Ailuropoda melanoleuca</i></u> :<br>ACTA01113708              |
|                      |                                                                                |                                                                                                                                                                                                                                                                                                | <u><i>Equus caballus</i></u> :<br>AAWR02028373                      |
|                      |                                                                                |                                                                                                                                                                                                                                                                                                | <u><i>Bos taurus</i></u> : AC156403,<br>DAAA02006408                |
|                      |                                                                                |                                                                                                                                                                                                                                                                                                | <u><i>Pteropus vampyrus</i></u> :<br>ABRP01237998                   |
|                      |                                                                                |                                                                                                                                                                                                                                                                                                | <u><i>Canis lupus familiaris</i></u> :<br>CE645708,<br>AAEX02023698 |
| RCAN3-<br>1c,2,3,4,5 | <u><i>Pan troglodytes</i></u> :<br>XM_001167438,<br>XM_513206,<br>XM_001167462 |                                                                                                                                                                                                                                                                                                | Listed in Table S3                                                  |
|                      | <u><i>Pongo abelii</i></u> :<br>XM_002811275                                   |                                                                                                                                                                                                                                                                                                |                                                                     |
|                      |                                                                                | <u><i>Papio anubis</i></u> :<br>EY277657                                                                                                                                                                                                                                                       |                                                                     |
|                      | <u><i>Bos taurus</i></u> :<br>NM_001045945                                     | <u><i>Bos taurus</i></u> :<br>EH159774,<br>EE890946,<br>CB418553,<br>DV800730,<br>DY169856,<br>DV840262,<br>DY196129                                                                                                                                                                           |                                                                     |
|                      | <u><i>Sus scrofa</i></u> :<br>AK345639,<br>AK349452                            | <u><i>Sus scrofa</i></u> :<br>EW106490,<br>CJ017081,<br>BP141896,<br>FS697917,<br>FS658919,<br>FS713196,<br>FS705492,<br>FS705395,<br>FS700296,<br>DB789326,<br>BW977154,<br>BP440110,<br>BP167063,<br>FS698073,<br>FS701530,<br>DB805081,<br>FS707785,<br>FS690114,<br>FS712957,<br>FS712198, |                                                                     |

|                       |                                                     |                                                                                                                                                                                                                          |                    |
|-----------------------|-----------------------------------------------------|--------------------------------------------------------------------------------------------------------------------------------------------------------------------------------------------------------------------------|--------------------|
|                       |                                                     | BW974719,<br>FS705422,<br>BW968935,<br>CJ002637,<br>FS692423,<br>FS709612,<br>FS706765,<br>BW977041,<br>FS709837,<br>CJ007783,<br>FS674466,<br>CJ036933,<br>BP455127,<br>BP171584,<br>FS713336,<br>EW387620,<br>FS718176 |                    |
|                       | <u><i>Canis lupus familiaris</i></u> :<br>XM 544495 | <u><i>Canis lupus familiaris</i></u> :<br>DN375624                                                                                                                                                                       |                    |
| <i>RCAN3-1c,3,4,5</i> | None                                                | <u><i>Sus scrofa</i></u> :<br>BW970272                                                                                                                                                                                   | Listed in Table S3 |
