# Supplementary material for: Complexity of Bidirectional Transcription and Alternative Splicing at Human RCAN3 Locus
Source: PubMed Central journal article supplement (PMC3178534; doi:10.1371/journal.pone.0024508), 2011-09-22
Supplement: pone.0024508.s006.pdf [file pone.0024508.s006.pdf]

**Table S3. RCAN3-1,2,3,4,5 and RCAN3-1c,2,3,4,5 detailed comparison in other species**

| <b>cDNA</b>             | <b>Reference nr/nt others</b>                    | <b>Relative genomic reference sequence</b>               | <b>Relative ESTs</b>                                                                                                                                                                                                                                                                                                                                            |
|-------------------------|--------------------------------------------------|----------------------------------------------------------|-----------------------------------------------------------------------------------------------------------------------------------------------------------------------------------------------------------------------------------------------------------------------------------------------------------------------------------------------------------------|
| <i>RCAN3-1,2,3,4,5</i>  | <i>Pan troglodytes</i> :<br>XM_001167542         | <i>Pan troglodytes</i> :<br>NW_001230294                 | None                                                                                                                                                                                                                                                                                                                                                            |
|                         | <i>Pongo abelii</i> :<br>XM_002811276            | <i>Pongo abelii</i> :<br>NW_002875515                    |                                                                                                                                                                                                                                                                                                                                                                 |
|                         | <i>Macaca mulatta</i> *:<br>XM_001113362         | <i>Macaca mulatta</i> :<br>NW_001111099<br>NW_001111036  |                                                                                                                                                                                                                                                                                                                                                                 |
|                         | <i>Callithrix jacchus</i> *:<br>XM_002750444     | <i>Callithrix jacchus</i> :<br>NW_003183707              |                                                                                                                                                                                                                                                                                                                                                                 |
| <i>RCAN3-1c,2,3,4,5</i> | <i>Pan troglodytes</i> :<br>XM_001167438         | <i>Pan troglodytes</i> :<br>NW_001230294                 |                                                                                                                                                                                                                                                                                                                                                                 |
|                         | <i>Pongo abelii</i> :<br>XM_002811275            | <i>Pongo abelii</i> :<br>NW_002875515                    |                                                                                                                                                                                                                                                                                                                                                                 |
|                         | <i>Macaca mulatta</i> *:<br>XM_001113362         | <i>Macaca mulatta</i> :<br>NW_001111099,<br>NW_001111036 |                                                                                                                                                                                                                                                                                                                                                                 |
|                         | <i>Callithrix jacchus</i> *:<br>XM_002750444     | <i>Callithrix jacchus</i> :<br>NW_003183707              |                                                                                                                                                                                                                                                                                                                                                                 |
|                         | <i>Ailuropoda melanoleuca</i> *:<br>XM_002913282 | <i>Ailuropoda melanoleuca</i> :<br>NW_003217307          |                                                                                                                                                                                                                                                                                                                                                                 |
|                         | <i>Bos taurus</i> :<br>NM_001045945              | <i>Bos taurus</i> :<br>NW_003103851                      | <i>Bos taurus</i> : EH159774,<br>EE890946, CB418553,<br>DV840262, DY196129,<br>DV800730, DY169856                                                                                                                                                                                                                                                               |
|                         | <i>Sus scrofa</i> :<br>AK345639                  | <i>Sus scrofa</i> :<br>CU972460                          | <i>Sus scrofa</i> : EW106490,<br>CJ017081, BP141896,<br>FS697917, FS658919,<br>FS713196, FS705492,<br>FS705395, FS700296,<br>DB789326, BW977154,<br>BP440110, BP167063,<br>FS698073, FS701530,<br>DB805081, FS707785,<br>FS690114, FS712957,<br>FS712198, BW974719,<br>FS705422, BW968935,<br>CJ002637, FS692423,<br>FS709612, FS706765,<br>BW977041, FS709837, |

|  |                                             |                                                           |                                                                                                                                                               |
|--|---------------------------------------------|-----------------------------------------------------------|---------------------------------------------------------------------------------------------------------------------------------------------------------------|
|  |                                             |                                                           | CJ007783, FS674466,<br>CJ036933, BP455127,<br>BP171584, FS713336,<br>EW387620, FS718176,<br>BP439743, EB421270,<br>FS661279, FS663793,<br>CV866456            |
|  | <u>Canis lupus familiaris:</u><br>XM_544495 | <u>Canis lupus familiaris:</u><br>NW_876292,<br>NC_006584 | <u>Canis lupus familiaris:</u><br>DN375624                                                                                                                    |
|  | <u>Mus musculus:</u><br>NM_022980           | <u>Mus musculus:</u><br>NT_039267                         | <u>Mus musculus:</u><br>BB641796, AA414395,<br>BB639047, BY192142,<br>BF463754, BE994224,<br>BE984311, AI854381,<br>AI842260, AI666466,<br>BY246936, BF021307 |
|  | <u>Rattus norvegicus*:</u><br>NM_001012746  | <u>Rattus norvegicus:</u><br>NW_001084844                 |                                                                                                                                                               |
|  | <u>Gallus gallus:</u><br>NM_001030907       | <u>Gallus gallus:</u><br>NW_001471589                     | <u>Gallus gallus:</u><br>CO772075, AJ447031,<br>AM068641, BM491687,<br>BU245031, CN224613,<br>AJ738137, BU294280,<br>BU205026, CO503258                       |
|  | <u>Danio rerio:</u><br>NM_001005392         | <u>Danio rerio:</u><br>NW_001877781                       | <u>Danio rerio:</u> CF996050                                                                                                                                  |
